# 1 Lapses in perceptual judgments reflect exploration

2 Sashank Pisupati\*<sup>1,2</sup>, Lital Chartarifskey-Lynn\*<sup>1,2</sup>, Anup Khanal<sup>1</sup> & Anne K. Churchland<sup>1</sup>

3 <sup>1</sup>*Cold Spring Harbor Laboratory, Cold Spring Harbor, New York, USA*

4 <sup>2</sup>*Watson School of Biological Sciences, Cold Spring Harbor, New York, USA*

## 5 **ABSTRACT**

6 During perceptual decision making, subjects often display a constant rate of errors independent of  
7 evidence strength, referred to as “lapses”. Their proper treatment is crucial for accurate estimation  
8 of perceptual parameters, however they are often treated as a nuisance arising from motor errors  
9 or inattention. Here, we propose that lapses can instead reflect a dynamic form of exploration.  
10 We demonstrate that perceptual uncertainty modulates the probability of lapses both across and  
11 within modalities on a multisensory discrimination task in rats. These effects cannot be accounted  
12 for by inattention or motor error, however they are concisely explained by uncertainty-guided  
13 exploration. We confirm the predictions of the exploration model by showing that changing the  
14 magnitude or probability of reward associated with one of the decisions selectively affects the  
15 lapses associated with that decision in uncertain conditions, while leaving “sure-bet” decisions  
16 unchanged, as predicted by the model. Finally, we demonstrate that muscimol inactivations of  
17 secondary motor cortex and posterior striatum affect lapses asymmetrically across modalities. The  
18 inactivations can be captured by a devaluation of actions corresponding to the inactivated side, and  
19 do not affect “sure-bet” decisions. Together, our results suggest that far from being a nuisance,  
20 lapses are informative about subjects’ action values and deficits thereof during perceptual decisions.

## 21 INTRODUCTION

22 Perceptual judgments are often modeled using noisy ideal observers (e.g., Signal detection theory,  
23 Green, Swets, et al., 1966; Bayesian decision theory, Dayan and Daw, 2008) that explain subjects'  
24 errors as a consequence of noise in sensory evidence. This predicts an error rate that decreases  
25 with increasing sensory evidence, capturing the sigmoidal relationship often seen between evidence  
26 strength and subjects' decision probabilities (i.e. the psychometric function; Fig. 1).

27 Human and non-human subjects often deviate from these predictions, displaying an additional  
28 constant rate of errors independent of the evidence strength known as “lapses”, leading to errors  
29 even on extreme stimulus levels (Wichmann and Hill, 2001; Gold and Ding, 2013; Carandini and  
30 Churchland, 2013; Busse et al., 2011). Despite the knowledge that ignoring or improperly fitting  
31 lapses can lead to serious mis-estimation of psychometric parameters (Wichmann and Hill, 2001;  
32 Prins and Kingdom, 2018), the cognitive mechanisms underlying lapses remain poorly understood.  
33 A number of possible sources of noise have been proposed to explain lapses, typically peripheral to  
34 the decision-making process.

35 One class of explanations for lapses relies on pre-decision noise added due to fluctuating  
36 attention, which is often operationalized as a small fraction of trials on which the subject fails to  
37 attend to the stimulus (Wichmann and Hill, 2001). On these trials, it is assumed that the subject  
38 cannot specify the stimulus (i.e. sensory noise with infinite variance, Bays, Catalao, and Husain,  
39 2009) and hence guesses randomly or in proportion to prior beliefs. This model can be thought of as  
40 a limiting case of the Variable Precision model, which assumes that fluctuating attention has a more

41 graded effect of scaling the sensory noise variance (Garrido, Dolan, and Sahani, 2011), giving rise  
42 to heavy tailed estimate distributions, resembling lapses in the limit of high variability (Shen and  
43 Ma, 2019; Zhou et al., 2018). Temporal forms of inattention have also been proposed to give rise to  
44 lapses, where the animal ignores early or late parts of the evidence (impulsive or leaky integration,  
45 Erlich et al., 2015).

46 An alternative class of explanations for lapses relies on a fixed amount of noise added after a  
47 decision has been made, commonly referred to as “post-categorization” noise (Erlich et al., 2015)  
48 or decision noise (Law and Gold, 2009). Such noise could arise from errors in motor execution  
49 (e.g. finger errors , Wichmann and Hill, 2001), non-stationarities in the decision rule arising from  
50 computational imprecision (Findling et al., 2018), suboptimal weighting of choice or outcome  
51 history (Roy et al., 2018; Busse et al., 2011) or random variability added for the purpose of  
52 exploration (eg. “ $\epsilon$ -greedy” decision rules).

53 A number of recent observations have cast doubt on fixed early- or late-stage noise as  
54 satisfactory explanations for lapses. For instance, many of these explanations predict that lapses  
55 should occur at a constant rate, while in reality, lapses are known to reduce in frequency with  
56 training in non-human primates (Law and Gold, 2009). Further, they can occur with different  
57 frequencies for different stimuli even within the same subject (in rodents, Nikbakht et al., 2018; and  
58 humans, Mihali et al., 2018; Bertolini et al., 2015), suggesting that they may reflect task-specific,  
59 associative processes that can vary within a subject.

60 Lapse frequencies are even more variable across subjects and can depend on the subject’s

61 age and state of brain function. For instance, lapses are significantly higher in children and patient  
62 populations than healthy adult humans (Witton, Talcott, and Henning, 2017). Moreover, a number  
63 of recent studies in rodents have found that perturbing neural activity in secondary motor cortex  
64 (Erlich et al., 2015) and striatum (Yartsev et al., 2018; Guo et al., 2018) has dramatic, asymmetric  
65 effects on lapses in auditory decision-making tasks. Because these perturbations were made in  
66 structures known to be involved in action selection, an intriguing possibility is that lapses reflect  
67 an integral part of the decision-making process, rather than a peripheral source of noise. However,  
68 because these studies only tested auditory stimuli, they did not afford the opportunity to distinguish  
69 sensory modality-specific deficits from general decision-related deficits. Taken together, these  
70 observations point to the need for a deeper understanding of lapses that accounts for effects of  
71 stimulus set, learning, age and neural perturbations.

72       Here, we leverage a multisensory task in rodents to reveal a novel explanation for lapses:  
73 uncertainty-guided exploration, a well known strategy for balancing exploration and exploitation  
74 in value-based decisions (Dayan and Daw, 2008). This is also known as Thompson sampling  
75 and can be operationalized as a dynamic “softmax” decision rule (Gershman, 2018). We confirm  
76 the predictions of the exploration model by manipulating reward under conditions of varying  
77 uncertainty. Finally, we demonstrate that suppressing secondary motor cortex or posterior striatum  
78 unilaterally has an asymmetric effect on lapses that generalizes across sensory modalities, but only  
79 in uncertain conditions. This can be accounted for by an action value deficit on the inactivated side,  
80 reconciling the proposed perceptual and value-related roles of these areas and suggesting that lapses  
81 are informative about the subjective values of actions.

## 82 RESULTS

### 83 Testing ideal observer predictions in perceptual decision-making

84 We leveraged an established decision-making task (Raposo, Sheppard, et al., 2012; Raposo, Kauf-  
85 man, and Churchland, 2014; Sheppard, Raposo, and Churchland, 2013; Licata et al., 2017) (Fig.  
86 1) in which freely moving rats judge whether the fluctuating rate of a 1000 ms series of auditory  
87 clicks and/or visual flashes (rate range: 9 - 16 Hz) is high or low compared with an abstract category  
88 boundary (Fig. 1a - c). Using Bayesian decision theory, we constructed an ideal observer for our  
89 task that selects choices that maximize expected reward (See Methods: Modelling). To test whether  
90 behavior matches ideal observer predictions, we presented multisensory trials with matched visual  
91 and auditory rates (i.e., both modalities carried the same number of events/s; Fig. 1c, bottom)  
92 interleaved with visual-only or auditory-only trials. This allowed us to separately estimate the  
93 sensory noise in the animals' visual and auditory system, and compare the measured performance  
94 on multisensory trials to the predictions of the ideal observer.

95 Performance was assessed using a psychometric curve, i.e., the probability of high-rate  
96 decisions as a function of stimulus rate (Fig. 1f). The ideal observer model predicts a relationship  
97 between the slope of the psychometric curve and the noise in the animal's estimate: the higher the  
98 standard deviation ( $\sigma$ ) of sensory noise, the more uncertain the animals estimate of the rate and  
99 the shallower the psychometric curve. On multisensory trials, the ideal observer should have a  
100 more certain estimate of the rate, driving a steeper psychometric curve (Fig. 1e, visual [blue] and  
101 auditory [green]  $\sigma$  values are larger than multisensory  $\sigma$  [red] and Fig. 1f, red curve is steeper than

102 green and blue curves). Since this model does not take lapses into account, it would predict perfect  
 103 performance on the easiest stimuli regardless of uncertainty, and thus all curves should asymptote at  
 104 0 and 1 (Fig 1f).

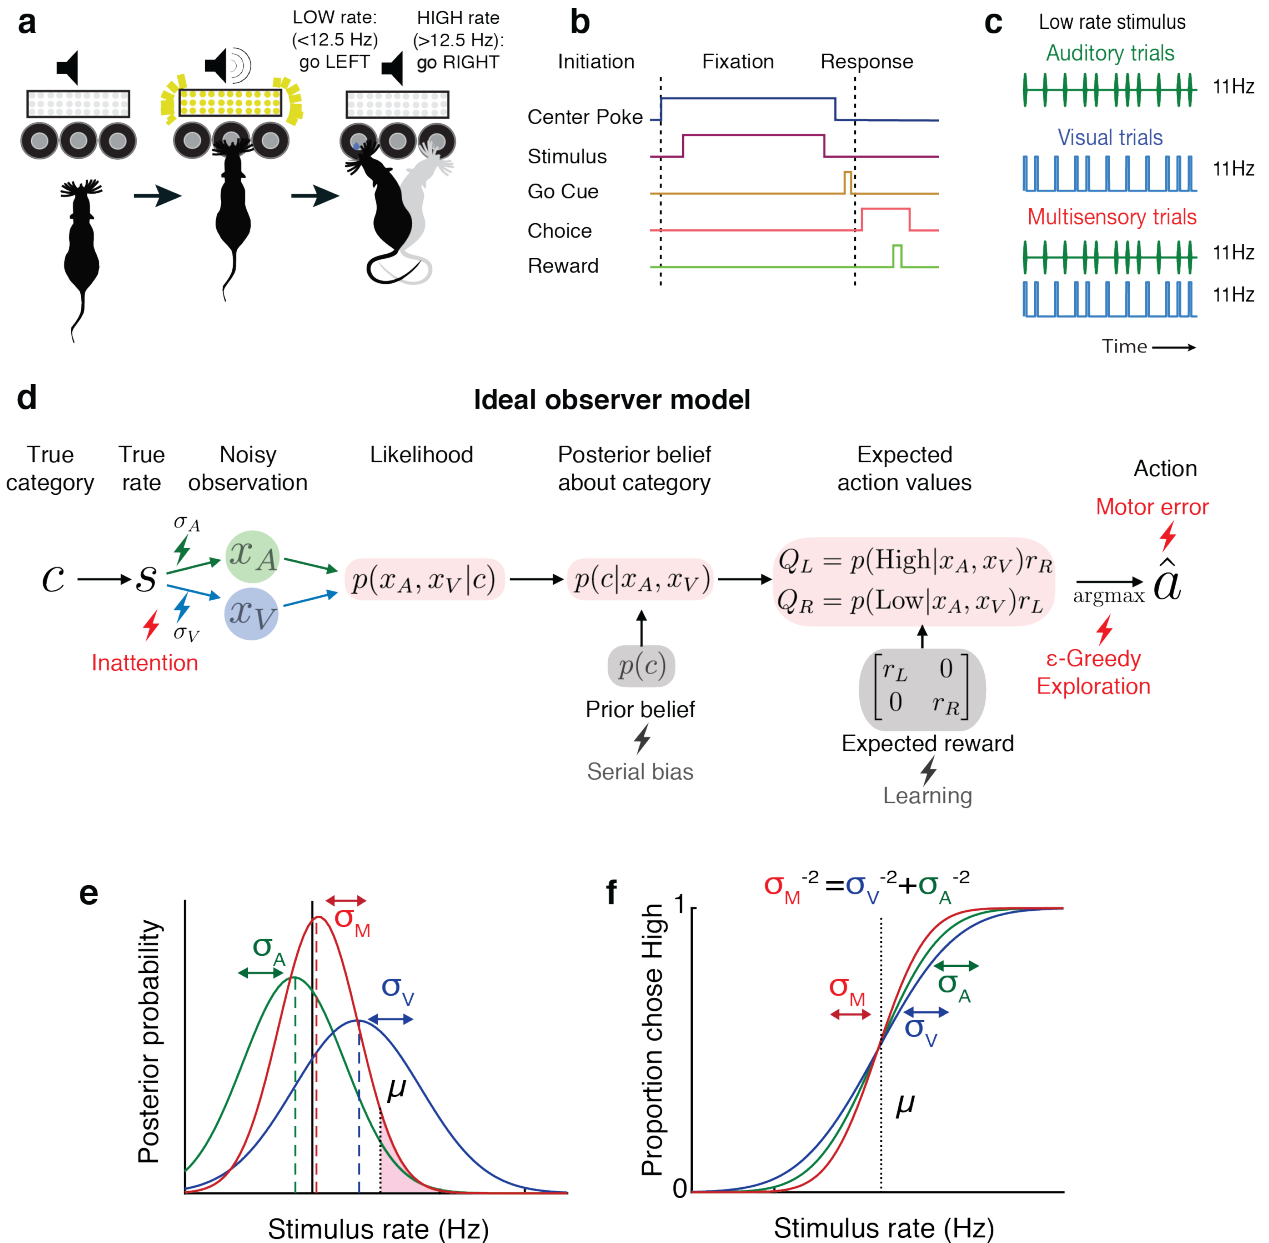

105

106 **Figure 1 Testing ideal observer predictions in perceptual decision-making. (a)** Schematic drawing of  
 107 rate discrimination task. Rats initiate trials by poking into a center port. Trials consist of visual stimuli

108 presented via a panel of diffused LEDs, auditory stimuli presented via a centrally positioned speaker or  
109 multisensory stimuli presented from both. Rats are rewarded with a  $24\mu\text{l}$  drop of water for reporting high  
110 rate stimuli (greater than 12.5 Hz) by poking in the right port and low rate stimuli (lower than 12.5 Hz) with  
111 leftward choices. **(b)** Timeline of task events. **(c)** Example stimulus on auditory (top), visual (middle) and  
112 multisensory trials (bottom). Stimuli consist of a stream of events separated by long (100 ms) or short (50  
113 ms) intervals. Multisensory stimuli consist of visual and auditory streams carrying the same underlying  
114 rate. Visual, auditory and multisensory trials were randomly interleaved (40% visual, 40% auditory, 20%  
115 multisensory). **(d)** Schematic outlining the computations of a Bayesian ideal observer. Stimulus with a true  
116 underlying rate  $s$  gives rise to noisy observations  $x_A$  and  $x_V$ , which are then integrated with each other  
117 and with prior beliefs to form a multisensory posterior belief about the rate. This is combined with prior  
118 beliefs about choice to produce a posterior belief about the correct choice, and further combined with reward  
119 information to form expected action values  $Q_L, Q_R$ . The ideal observer selects the action  $\hat{c}$  with maximum  
120 expected value. Lightning bolts denote proposed sources of noise that can give rise to (red) or exacerbate  
121 (grey) lapses, causing deviations from the ideal observer. **(e)** Posterior beliefs on an example trial assuming  
122 flat priors. Solid black line denotes true rate, blue and green dotted lines denote noisy visual and auditory  
123 observations, with corresponding unisensory posteriors shown in solid blue and green. Solid red denotes the  
124 multisensory posterior, centered around the M.A.P. rate estimate in dotted red. Shaded fraction denotes the  
125 probability of the correct choice being rightward, with  $\mu$  denoting the category boundary. **(f)** Ideal observer  
126 predictions for the psychometric curve, i.e. proportion of rightward choices for each rate. Inverse slopes of  
127 the curves in each condition are reflective of the posterior widths on those conditions, assuming flat priors.  
128 The value on the abscissa corresponding to the curve's midpoint indicates the category boundary (assuming

129 equal rewards).

### 130 **Lapses cause deviations from ideal observer, and are reduced on multisensory trials**

131 In practice, the shapes of empirically obtained psychometric curves do not perfectly match the  
132 ideal observer (Fig. 2e, green) since they asymptote at values that are less than 1 or greater than  
133 0. This is a well known phenomenon in psychophysics (Wichmann and Hill, 2001), requiring two  
134 additional lapse parameters to precisely capture the asymptotes. To account for lapses, we fit a  
135 four-parameter psychometric function to the subjects' choice data (Fig. 2a, Equation 1 in Methods)  
136 with the Palamedes toolbox (Prins and Kingdom, 2018).  $\gamma$  and  $\lambda$  are the lower and upper asymptote  
137 of the psychometric function, which parameterize lapses away from the left and the right reward  
138 ports, respectively;  $\phi$  is a sigmoidal function, in our case the cumulative normal distribution;  $x$  is  
139 the event rate, i.e. the number of flashes or beeps presented during the one second stimulus period;  
140  $\mu$  parameterizes the midpoint of the psychometric function and  $\sigma$  describes the inverse slope after  
141 correcting for lapses.

142 How can we be sure that the asymptotes seen in the data truly reflect non-zero asymptotes  
143 rather than fitting artifacts or insufficient data at the asymptotes? To test whether lapses were truly  
144 necessary to explain the behavior, we fit the curves with and without lapses (Fig. 2b) and tested  
145 whether the lapse parameters were warranted. The ideal observer without lapses was rejected in  
146 15/17 rats by BIC, and in all rats by AIC. Fitting a fixed lapse rate was not sufficient to capture  
147 the data, nor was fitting a lapse rate that was constrained to be less than 0.1 (Wichmann and Hill,  
148 2001), and the data warranted fitting separate lapse rates to each condition ("free lapses" model



149 outperforms “fixed lapses”, “restricted lapses” or “no lapses/ideal observer” in Fig. 2g).

150 Multisensory trials offer an additional, strong test of ideal observer predictions. In addition to  
151 perfect performance on the easiest stimuli, the ideal observer model predicts the minimum possible  
152 uncertainty achievable on multisensory trials through optimal integration (Ernst and Bulthoff, 2004;  
153 Equation 2 in Methods). By definition, better-than-optimal performance is impossible. However,  
154 studies in rats performing multisensory decision-making tasks suggest that in practice, animals’  
155 performance appears to exceed optimal predictions (Raposo, Sheppard, et al., 2012; Nikbakht  
156 et al., 2018) seeming, at first, to violate the ideal observer model. Moreover, in these datasets,  
157 performance on the easiest stimuli was not perfect and asymptotes deviated from 0 and 1. As in  
158 these previous studies, when we fit performance without lapses, multisensory performance was  
159 significantly supra-optimal ( $p=0.0012$ , paired t-test), i.e. better than the ideal observer prediction  
160 (Fig. 2c, data points are above the unity line). This was also true when lapse probabilities were  
161 assumed to be fixed across conditions ( $p=0.0018$ ) or when they were assumed to be less than 0.1  
162 ( $p=0.0003$ ). However, when we allowed lapses to vary freely across conditions, performance was  
163 indistinguishable from optimal (Fig. 2d, data points are on the unity line). This reaffirms that proper  
164 treatment of lapses is crucial for accurate estimation of perceptual parameters and offers a potential  
165 explanation for previous reports of supra-optimality.

166 Using this improved fitting method, we replicated previous observations (Raposo, Sheppard, et  
167 al., 2012; Raposo, Kaufman, and Churchland, 2014) showing that animals have improved sensitivity  
168 (lower  $\sigma$ ) on multisensory vs. unisensory trials (Fig. 2e, red curve is steeper than green/blue curves;

169 Fig. 2f, top). Interestingly, we observed that animals also had a lower lapse probability ( $\lambda + \gamma$ )  
 170 on multisensory trials (Fig. 2e, asymptotes for red curve are closer to 0 and 1; n=17 rats, 347537  
 171 trials). This was consistently observed across animals (Fig. 2f bottom, the probability of lapses on  
 172 multisensory trials was 0.06 on average, compared to 0.17 on visual,  $p=1.4e-4$  and 0.21 on auditory,  
 173  $p=1.5e-5$ ).

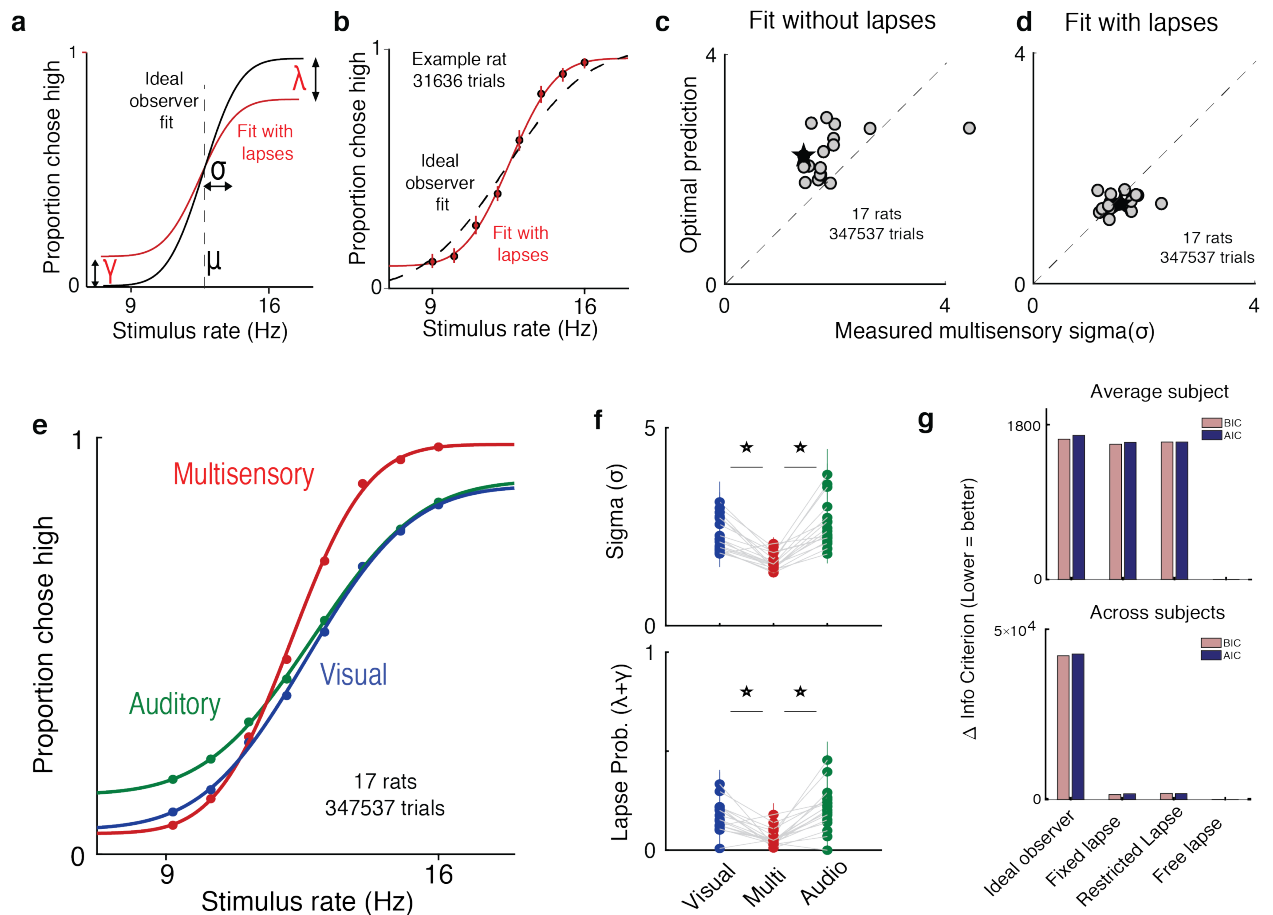

174

175 **Figure 2 Deviations from ideal observer reflect lapses in judgment.** (a) Schematic psychometric per-  
 176 formance of an ideal observer (black) vs. a model that includes lapses (green). The ideal observer fit  
 177 includes two parameters: intercept ( $\mu$ ) and slope ( $\sigma$ ). The four-parameter cumulative normal distribution  
 178 individually fits  $\mu$ ,  $\sigma$ , and lapse probability for high rate ( $\gamma$ ) and low rate choices ( $\lambda$ ). Dotted line shows

179 the category boundary (12.5 Hz). **(b)** Subject data was fit with a an ideal observer model (black) and a  
180 four-parameter model (green). Dotted line shows the category boundary (12.5 Hz). **(c,d)** Ideal observer  
181 predictions vs. measured multisensory sigma for fits with and without lapses. **(c)** Multisensory integration  
182 seems supra-optimal when not accounting for lapses. **(d)** Optimal multisensory integration is restored when  
183 accounting for lapses. (n = 17 rats. Points represent individual rats; star represents pooled data across all  
184 rats. Data points that lie on the unity line represent cases in which the measured sigma was equal to the  
185 optimal prediction). **(e)** Rats' psychometric curves on auditory (green), visual (blue) and multisensory (red)  
186 trials. Bold lines represent data pooled across 17 rats; thin lines represent individual rats. **(f)** Fit values of  
187 sigma (top) and lapse parameters (bottom) on unisensory and multisensory conditions. Both parameters  
188 showed significant reduction on the multisensory conditions (paired t-test,  $p < 0.05$ ); n=17 rats (347537 trials).  
189 **(g)** Model comparison using BIC(pink) and AIC(blue) for the average subject (top) and across individual  
190 subjects (bottom). Lower scores indicate better fits. Both metrics favor a model where lapses are allowed  
191 to vary freely across conditions ("Free lapse") over one without lapses ("Ideal observer"), one with a fixed  
192 probability of lapses ("Fixed lapse") or where the lapses are restricted to being less than 0.1 ("Restricted  
193 lapse").

194 **A novel model, uncertainty-guided exploration, explains lapses better than traditional mod-**  
195 **els of inattention or motor-error**

196 What could account for the reduction in lapse probability on multisensory trials? While adding extra  
197 parameters to the ideal observer model fit the behavioral data well and accounted for the reduction  
198 in inverse-slope on multisensory trials, this success doesn't provide an explanation for why lapses  
199 are present in the first place, nor why they differ between stimulus conditions.

200 To investigate this, we considered possible sources of noise that have traditionally been  
201 invoked to explain lapses (Fig. 1d). We first hypothesized that lapses might be due to a fixed  
202 amount of noise added once the decision has been made. These sources of noise could include  
203 decision noise due to imprecision (Findling et al., 2018), motor errors (Wichmann and Hill, 2001)  
204 or  $\epsilon$ -greedy exploration. However, these sources should hinder decisions equally across conditions  
205 (Supplementary Fig. 1b), which cannot explain our observation of condition-dependent lapse rates  
206 (Fig. 2f).

207 A second explanation is that lapses arise due to inattention on a small fraction of trials.  
208 Inattention would drive the animal to guess randomly, producing lapse rates whose sum should  
209 reflect the probability of not attending (Fig. 3a, Methods). According to this explanation, the  
210 lower lapse rate on multisensory trials reflects increased attention on those trials, perhaps due to  
211 their increased bottom-up salience (i.e. two streams of stimuli instead of one). To test this, we  
212 leveraged a multisensory condition that manipulates uncertainty without changing salience (Raposo,  
213 Sheppard, et al., 2012). Specifically, we interleaved standard matched-rate multisensory trials with  
214 “neutral” multisensory trials for which the rate of the auditory stimuli ranged between 9-16 Hz,  
215 while the visual stimuli was always 12 Hz. This rate was so close to the category boundary (12.5  
216 Hz) that it did not provide compelling evidence for one choice or the other (Fig. 3d, left), thus  
217 reducing the information in the multisensory stimulus and increasing uncertainty. However, since  
218 both “neutral” and “matched” conditions are multisensory, they should be equally salient, and since  
219 they are interleaved, the animal would be unable to identify the condition without actually attending  
220 to the stimulus. According to the inattention model, matched and neutral trials should have the same

221 rate of lapses, only differing in their  $\sigma$  (Supplementary Fig 1c).

222 Contrary to this prediction, we observed higher lapse rates on “neutral” trials, where the  
223 uncertainty was high, than on “matched” trials, where the uncertainty was lower (Fig. 3d). The  
224 dependence of lapses on uncertainty is reminiscent of the dependence of lapse on uncertainty  
225 observed when comparing unisensory vs. multisensory trials (Fig. 2e,f; Supplementary Fig. 1e).

226 Having observed that traditional explanations of lapse fail to account for the behavioral  
227 observations, we extended the ideal observer model to propose a novel explanation for lapses: an  
228 uncertainty-guided form of exploration using a dynamic softmax decision rule (Fig. 3b). This form  
229 of exploration is widely used in value-based decision making (Dayan and Daw, 2008) since it allows  
230 the subject to “tune” the degree of exploration using a  $\beta$  parameter, also known as an “inverse  
231 temperature”. Lower values of  $\beta$  encourage more exploration, while higher values of  $\beta$  encourage  
232 exploitation, with the limiting case of  $\beta \rightarrow \infty$  reducing to the reward-maximizing ideal observer.  
233 Modulating exploration with uncertainty is a well known heuristic called Thompson sampling, that  
234 automatically balances exploration and exploitation (Supplementary Fig. 4a-b) allowing one to  
235 efficiently maximize long-term expected reward (Gershman, 2018; Leike et al., 2016). This predicts  
236 that conditions with higher uncertainty in expected reward (e.g. unisensory or neutral trials) should  
237 encourage more exploration, giving rise to more frequent lapses (Supplementary Fig. 4c-d).

238 As a result, the uncertainty-guided exploration model predicts an increase not only in the  $\sigma$   
239 but also in lapses on neutral trials, just as we observed (Fig. 3c)- in fact it predicts that both these  
240 parameters should match those on auditory trials. This model fit the data well (Fig. 3e, bottom).

241 The inattention model, by contrast, predicts that both conditions would have the same lapse rates  
 242 with the neutral condition simply having a greater  $\sigma$ . This model provided a worse fit to the data,  
 243 particularly missing the data at extreme stimulus values where lapses are most clearly apparent  
 244 (Fig. 3e, top). Model comparison using BIC and AIC both favored the exploration model over the  
 245 inattention model for average data (Fig. 3f top) as well as across individual subjects (Fig. 3f bottom,  
 246 Supplementary Fig. 3)

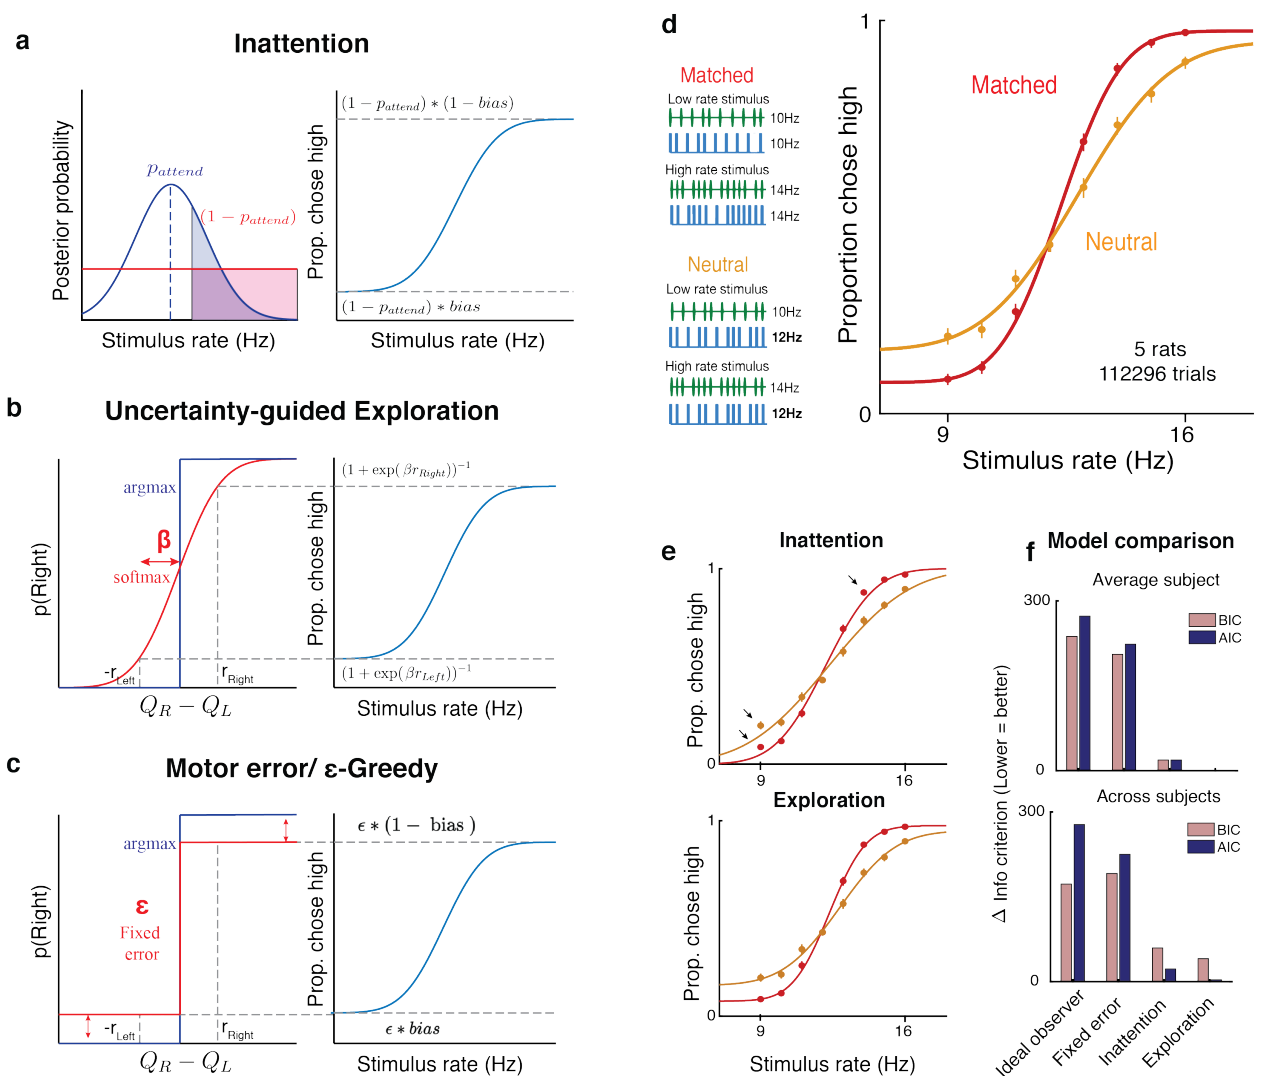

247  
 248 **Figure 3** Uncertainty-guided exploration offers a novel explanation for lapses. Models of lapses in

249 decision-making: **(a)** Inattention model of lapses. Left panel: on a small fraction of trials given by  $1 - p_{attend}$ ,  
250 the observer does not attend to the stimulus (red curve), leading to equal posterior probabilities of high and  
251 low rates (Shaded, clear regions of curve respectively) and guesses according to the probability *bias*, giving  
252 rise to lapses (right panel). The sum of lapse rates then reflects  $1 - p_{attend}$ , while their ratio reflects the  
253 *bias*. **(b)** Uncertainty-guided exploration model. Lapses can arise from exploratory decision rules such as  
254 the “softmax” (red) rather than reward-maximization (blue). Since the difference in expected value from  
255 right and left actions ( $Q_R - Q_L$ ) is bounded by the maximum reward magnitudes  $r_R$  and  $r_L$ , even when  
256 the stimulus is very easy, the maximum probability of choosing the higher value option is not 1, giving rise  
257 to lapses. Lapse rates on either side are then proportional to the reward magnitude on that side, and to a  
258 “temperature” parameter  $\beta$  that depends on the uncertainty in expected reward. **(c)** Motor error, or  $\epsilon$ -greedy  
259 model. Lapses can also arise from decision rules with a fixed proportion  $\epsilon$  of random exploratory choices,  
260 or due to motor errors occurring on  $\epsilon$  fraction of trials. The sum of lapses reflects  $\epsilon$  while their ratio reflects  
261 any *bias* in exploration or motor errors. **(d)** Left: multisensory stimuli designed to distinguish between  
262 attentional and non-attentional sources of lapses. Standard multisensory stimuli with matched visual and  
263 auditory rates (top) and “neutral” stimuli where one modality has a rate very close to the category boundary  
264 and is uninformative (bottom). Both stimuli are multisensory and designed to have equal bottom-up salience,  
265 and can only be distinguished by attending to them and accumulating evidence. Right: rat performance  
266 on interleaved matched (red) and neutral (orange) trials. **(e)** Since the matched and neutral conditions are  
267 equally salient, they are expected to have equal probabilities of attending, predicting similar total lapse rates  
268 in the inattention model (top, solid lines are model fits). Deviations from model fits are denoted with arrows.  
269 The exploration model (bottom) provides a better fit, by allowing for different levels of exploration in the

270 two conditions. (f) Model comparison using BIC (pink) and AIC (blue) both favor the uncertainty-guided  
271 exploration model.

## 272 **Reward manipulations confirm predictions of exploration model**

273 One of the key features of the uncertainty-guided exploration model is that lapses are exploratory  
274 choices made with full knowledge of the stimulus, and should depend only on the expected rewards  
275 associated with that stimulus category (Supplementary Fig. 4). This is in stark contrast to the  
276 inattention model and many other kinds of disengagement (Supplementary Fig. 2), in which lapses  
277 are caused by the observer disregarding the stimulus, and hence lapses at the two extreme stimulus  
278 levels are both influenced by a common underlying guessing process that depends on expected  
279 rewards from both stimulus categories. This is also in contrast with fixed motor error or  $\epsilon$ -greedy  
280 models in which lapses are independent of expected reward (Fig. 3c).

281 Therefore, a unique prediction of the exploration model is that selectively manipulating  
282 expected rewards associated with one of the stimulus categories should only affect lapses at one  
283 extreme of the psychometric function, whereas inattention and other kinds of disengagement predict  
284 that both lapses should be affected, and fixed error models predict that neither should be affected  
285 (Fig. 4a, Supplementary Fig. 1,2).

286 To experimentally test these predictions, we tested rats on the rate discrimination task with  
287 asymmetric rewards (Fig. 4b, top). Instead of rewarding high and low rate choices equally, we  
288 increased the water amount on the reward port associated with high-rates (rightward choices) so it  
289 was 1.5 times larger than before, without changing the reward on the the low-rate side (leftward



290 choices). In a second rat cohort we did the opposite: we devalued the choices associated with  
 291 high-rate trials by decreasing the water amount on that side port so it was 1.5 times smaller than  
 292 before, without changing the reward on the low-rate side.

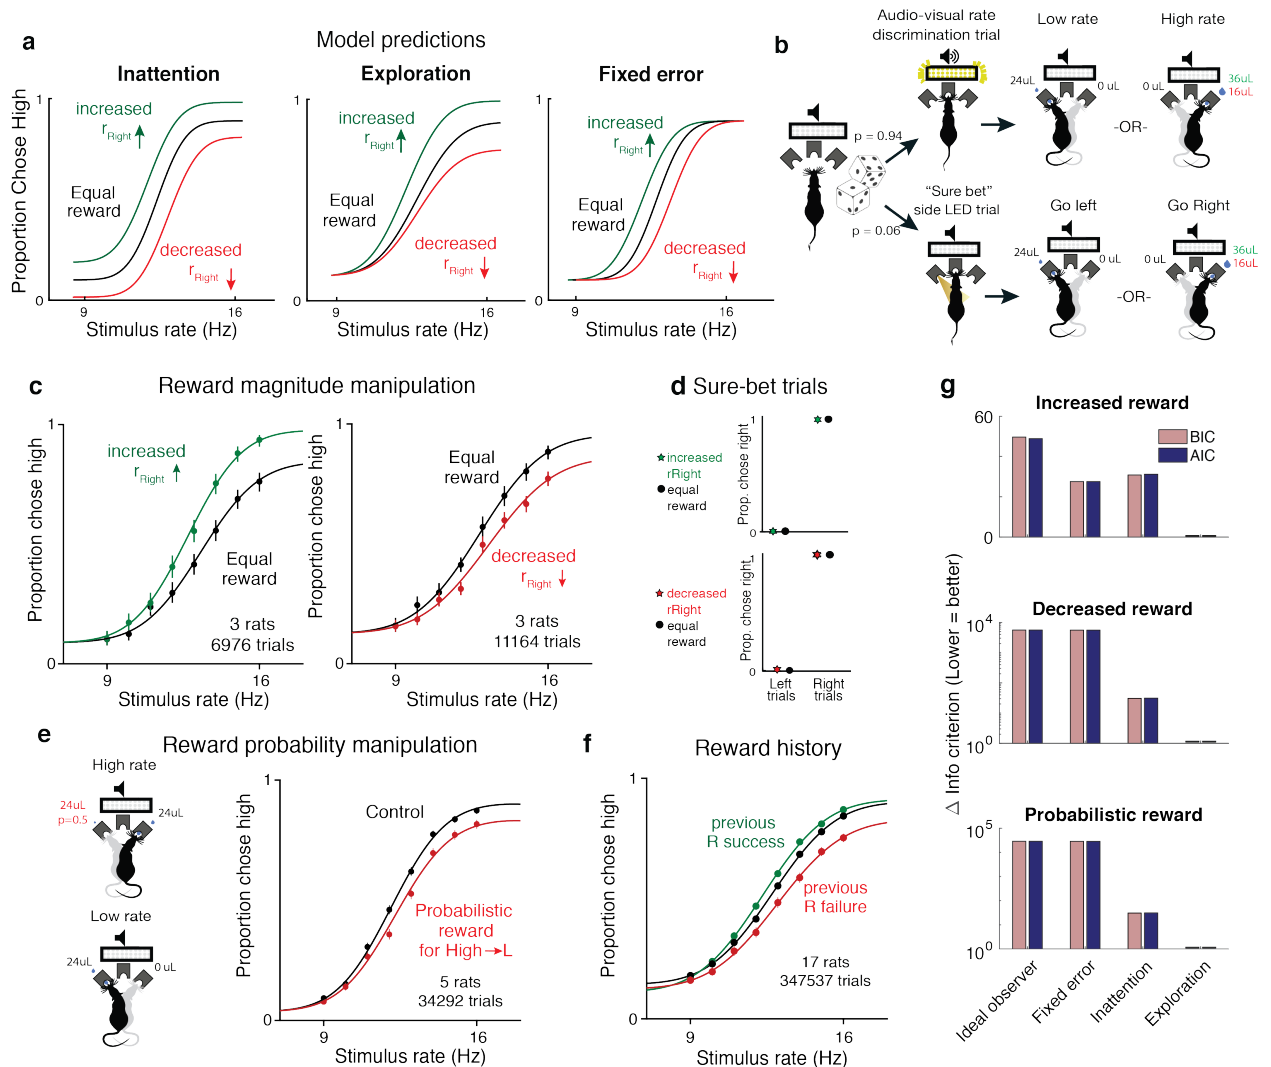

293

294 **Figure 4 Reward manipulations match predictions of the exploration model.** (a) The inattention, ex-  
 295 ploration and fixed error models make different predictions for increases and decreases in the reward  
 296 magnitude for rightward (high-rate) actions. The inattention model (left panel) predicts changes in lapses for  
 297 both right and left choices, while the exploration model (center panel) predicts changes in lapses only for

298 high rate choices, and fixed motor error or  $\epsilon$  greedy models (right) predict changes in neither lapse. Black  
299 line, equal rewards on both sides; green, increased rightward reward; red, decreased rightward reward. **(b)**  
300 Schematic of rate discrimination trials and interleaved “sure bet” (side LED) trials. The majority of the trials  
301 (94%) were rate discrimination trials as described in Figure 1. On sure-bet trials, a pure tone was played  
302 during a 0.2 second fixation period and one of the side ports was illuminated once the tone ended to indicate  
303 that reward was available there. Rate discrimination and sure-bet trials were randomly interleaved, as were  
304 left and right trials, and the rightward reward magnitude was either increased ( $36\mu\text{l}$ ) or decreased ( $16\mu\text{l}$ ) while  
305 maintaining the leftward reward at  $24\mu\text{l}$  **(c)** Rats’ behavior on rate discrimination trials following reward  
306 magnitude manipulations. High rate lapses decrease when water reward for high-rate choices is increased (left  
307 panel;  $n=3$  rats, 6976 trials), while high-rate lapses increase when reward on that side is decreased (right panel;  
308  $n=3$  rats, 11164 trials). Solid curves are exploration model fits with a single parameter change accounting for  
309 the manipulation. **(d)** Rats show nearly perfect performance on sure-bet trials, and are unaffected by reward  
310 manipulations on these trials. **(e)** Reward probability manipulation. (Left) Schematic of probabilistic reward  
311 trials, incorrect (leftward) choices on high rates were rewarded with a probability of 0.5, and all other rewards  
312 were left unchanged. (Right) Rat behavior and exploration model fits showing a selective increase in high-rate  
313 lapses ( $n=5$  rats, 34292 trials). **(f)** Rat behavior on equal reward trials conditioned on successes (green) or  
314 failures (red) on the right on the previous trials resembles effects of reward size manipulations. **(g)** Model  
315 comparison showing that AIC and BIC both favor the exploration model on data from all 3 manipulations.

316 The animals’ behavior on the asymmetric-reward task matched the predictions of the explo-  
317 ration model. Increasing the reward size on choices associated with high-rates led to a decrease in  
318 lapses for the highest rates and no changes in lapses for the lower rates (Fig. 4c, left;  $n=3$  rats, 6976

319 trials). Decreasing the reward of choices associated with high-rates led to an increase in lapses for  
320 the highest rates and no changes in lapses for the lower rates (Fig. 4c, right; n=3 rats, 11164 trials).  
321 This shows that both increasing and decreasing the value of one of the actions has an asymmetric  
322 effect on lapse probabilities that does not match the inattention model.

323 To confirm that the asymmetric changes in lapse rate that we observed were truly driven  
324 by uncertainty, we examined performance on randomly interleaved “sure bet” trials on which the  
325 uncertainty was very low (Fig. 4b, bottom). On these trials, a pure tone was played during the  
326 fixation period, after which an LED at one of the side ports was clearly illuminated, indicating a  
327 reward. Sure-bet trials comprised 6% of the total trials, and as with the rate discrimination trials,  
328 left and right trials were interleaved. Owing to the low uncertainty, the model predicts that very  
329 little exploration would be required in this condition, and that animals would very quickly reach  
330 perfect performance on these trials. Importantly, our model predicts that performance on “sure-bet”  
331 trials would be unaffected by imbalances in reward magnitude.

332 In keeping with this prediction, on sure-bet trials, performance was near perfect (right-  
333 ward probabilities of 0.003 [0.001,0.01] and 0.989 [0.978,0.995] on go-left and go-right trials  
334 respectively), and unaffected following reward manipulations (Fig. 4d: Rightward probabilities of  
335 0.004 [0.001, 0.014] and 0.996 [0.986,0.999] on increased reward, 0.006 [0.003,0.012] and 0.99  
336 [0.983,0.994] on decreased reward). This suggests that the effect of value on lapses is restricted  
337 to uncertain situations that encourage subjects to explore, rather than exploit. Further, because  
338 sure-bet trials were interleaved with more uncertain trials, their near-perfect performance indicates

339 that uncertainty can be estimated on the timescale of individual trials.

340 As an additional test of the model, we manipulated expected rewards by probabilistically  
341 rewarding incorrect i.e. leftward choices on high rate trials with a probability of 0.5, while leaving all  
342 other rewards unchanged (Fig. 4e left). The exploration model predicts that this should selectively  
343 increase the value of leftward actions on high rate trials, increasing lapses on high rates. Indeed,  
344 this is what we observed (Fig. 4e right, n=5 animals, 347537 trials), and the effect was strikingly  
345 similar to the decreased reward experiment, even though the two manipulations affect high rate  
346 action values through changes on opposite reward ports. Moreover, this suggests that lapses reflect  
347 changes in action value caused by changing either reward magnitudes or reward probabilities, as  
348 one would expect from the exploration model.

349 The subjective value of actions may naturally change with experience, even without the  
350 explicit reward manipulations described above. Throughout training, the animal uses outcomes of  
351 previous trials to learn and update the expected rewards from various actions, allowing it to learn  
352 the rules of the task (i.e. that high rate trials are rewarded on the right and so on). If such learning  
353 processes continue to persist in trained animals, either due to incomplete training (Law and Gold,  
354 2009), uncertainty in feedback, forgetting over time (Gershman, 2015; Drugowitsch and Pouget,  
355 2018), or perceived volatility (Yu and Cohen, 2009), then the outcomes of previous trials should  
356 continue to affect subsequent trials even in trained animals, as has been observed in a number of  
357 studies (Busse et al., 2011; Lak et al., 2018; Mendonca et al., 2018; Odoemene et al., 2018; Pinto  
358 et al., 2018; Scott et al., 2015). The action value of rightward choices should increase following

359 a rightward success and decrease following a rightward failure, predicting the same asymmetric  
360 changes in lapses as reward magnitude manipulations. As predicted, trials following rewarded and  
361 unrewarded rightward choices showed decreased and increased high-rate lapses, respectively (Fig.  
362 4g; same rats and trials as in Fig. 2e). Taken together, manipulations of value match the predictions  
363 of the uncertainty-dependent exploration model.

### 364 **Changes in lapses following prefrontal and striatal inactivations resemble value deficit**

365 The results of the reward experiments suggest that disrupting areas that confer value to actions  
366 should asymmetrically bias lapses, in contrast to disruptions of areas that encode sensory evidence,  
367 which should lead to horizontal biases without affecting lapses, or motor disruptions that simply  
368 make one of the actions harder to perform, which should affect both lapses (Supplementary Fig.  
369 11a, top). Crucially, in the absence of lapses, all three of these disruptions would look identical,  
370 producing a horizontal shift. This suggests that lapses could actually be informative about the  
371 stage of involvement of brain regions. Two candidate areas that we sought out to test in our  
372 multisensory task were secondary motor cortex (M2) and posterior striatum (pStr), both of which  
373 receive convergent input from primary visual and auditory cortices (Supplementary Fig. 5, results of  
374 simultaneous anterograde tracing from V1 and A1; also see Jiang and Kim, 2018; Barthas and Kwan,  
375 2017). Previous studies have shown effects on lapses following inactivation of both these areas in  
376 auditory tasks in rats (Erlich et al., 2015; Guo et al., 2018). These were interpreted as effects arising  
377 from either leaky accumulation (Erlich et al., 2015), post-categorization biases (Piet et al., 2017) or  
378 perceptual biases (Guo et al., 2018). These effects were very similar to the effects of manipulating  
379 reward in our task, hinting that these effects may actually arise from biased action values. However,

380 since these deficits were only demonstrated during auditory decision-making, these studies did  
381 not afford the opportunity to distinguish sensory modality-specific deficits from those that should  
382 generalize across modalities (e.g., visual, multisensory, auditory) like value deficits.

383 To test whether pStr and M2 have a modality-independent role in perceptual decisions, we  
384 suppressed activity of neurons in each of these areas using muscimol, a  $GABA_A$  agonist, during  
385 our multisensory rate discrimination task. We implanted bilateral cannulae in M2 (Supplementary  
386 Fig. 6b;  $n = 5$  rats; +2 mm AP 1.3 mm ML, 0.3 mm DV) and pStr (Supplementary Fig. 6a;  $n$   
387 = 6 rats; -3.2 mm AP, 5.4 mm ML, 4.1 mm DV) (Fig. 5a). On control days, rats were infused  
388 unilaterally with saline, followed by unilateral muscimol infusion the next day (M2: 0.1-0.5  $\mu\text{g}$ ,  
389 pStr 0.075-0.125  $\mu\text{g}$ ). We compared performance on the multisensory rate discrimination task for  
390 muscimol days with preceding saline days. Inactivation of the side associated with low-rate choices  
391 biased the animals to make more low-rate choices (Fig. 5b; left 6 panels: empty circles, inactivation  
392 sessions; full circles, control sessions) and inactivation of the side associated with high-rates biased  
393 them to make more high-rate choices (Fig. 5b, right 6 panels). The inactivations largely affected  
394 lapses on the contralateral side, while sparing those on the ipsilateral side (Fig. 5c). These results  
395 recapitulated previous findings, and were strikingly similar to the effects we observed following  
396 reward manipulations (as seen in Fig. 4c, right panel). These effects were seen across areas (Fig. 5b,  
397 top, M2; bottom, pStr) and modalities (Fig. 5b; green, auditory; blue, visual and red, multisensory),  
398 suggesting that pStr and M2 are part of a modality-independent circuit for decision-making.

399 Fitting the data with the exploration model revealed that the effects on lapses could be captured

400 by scaling the contralateral action value by a single parameter across modalities (Fig. 5b, Joint fits  
401 to control (solid lines) and inactivation trials (dotted lines) across modalities, differing only by a  
402 single parameter), similar to the reward manipulation experiments. Animals that were inactivated  
403 on the side associated with high rates showed increased low rate lapses (Fig. 5c, bottom right; data  
404 points are above the unity line; n=9 rats), but lapses did not change for high rates (Fig. 5c, top right;  
405 data points are on the unity line). This was consistent across areas and modalities (Fig. 5c; M2,  
406 triangles; pStr, circles; blue, visual; green, auditory). Animals that were inactivated on the side  
407 associated with low rates showed the opposite effect: increased lapses on high rate trials (Fig. 5c,  
408 top left; n=10 rats) and no change in lapses for low rate trials (Fig. 5c bottom left). To confirm  
409 that this effect was independent of the associated stimulus, some rats were trained on a reverse  
410 contingency regimen in which high rates were rewarded on the left side. The effects were consistent  
411 across both groups (Supplementary Fig. 7) and always resembled a devaluation of contralateral  
412 actions (Supplementary Fig. 11).

413 To determine whether changes in decision-making simply reflected motor impairments that  
414 drove a tendency to favor the ipsilateral side, we compared behavior on the sure-bet task described  
415 previously (Fig. 4b, bottom). Performance was spared on these trials (Fig. 5d): rats made correct  
416 rightward and leftward choices regardless of the side that was inactivated. This suggests that  
417 behavioral effects were restricted to situations in which there was uncertainty about the correct  
418 outcome. We also looked at multiple movement parameters such as wait time in the center port and  
419 movement times to ipsilateral and contralateral reward ports. There were no significant effects on  
420 movement parameters (Supplementary figure 10), suggesting that effects on decision outcome were

421 not due to a muscimol-induced motor impairment.

422 Finally, a model comparison revealed that a fixed contralateral value deficit captured the  
 423 inactivation effects much better than a fixed reduction in contralateral sensory evidence or a fixed  
 424 increase in contralateral motor effort, both for M2 (Fig. 5e top) and pStr (Fig. 5e bottom).  
 425 In uncertain conditions, this reduced contralateral value gives rise to more exploratory choices  
 426 and hence more lapses on one side (Fig. 5f top), but doesn't affect the other side, or sure-bet  
 427 trials on which the animals largely exploit. Together, this suggests that M2 and pStr have a  
 428 lateralized, modality-independent role in computing the expected value of actions based on incoming  
 429 multisensory information (Fig. 5f bottom).

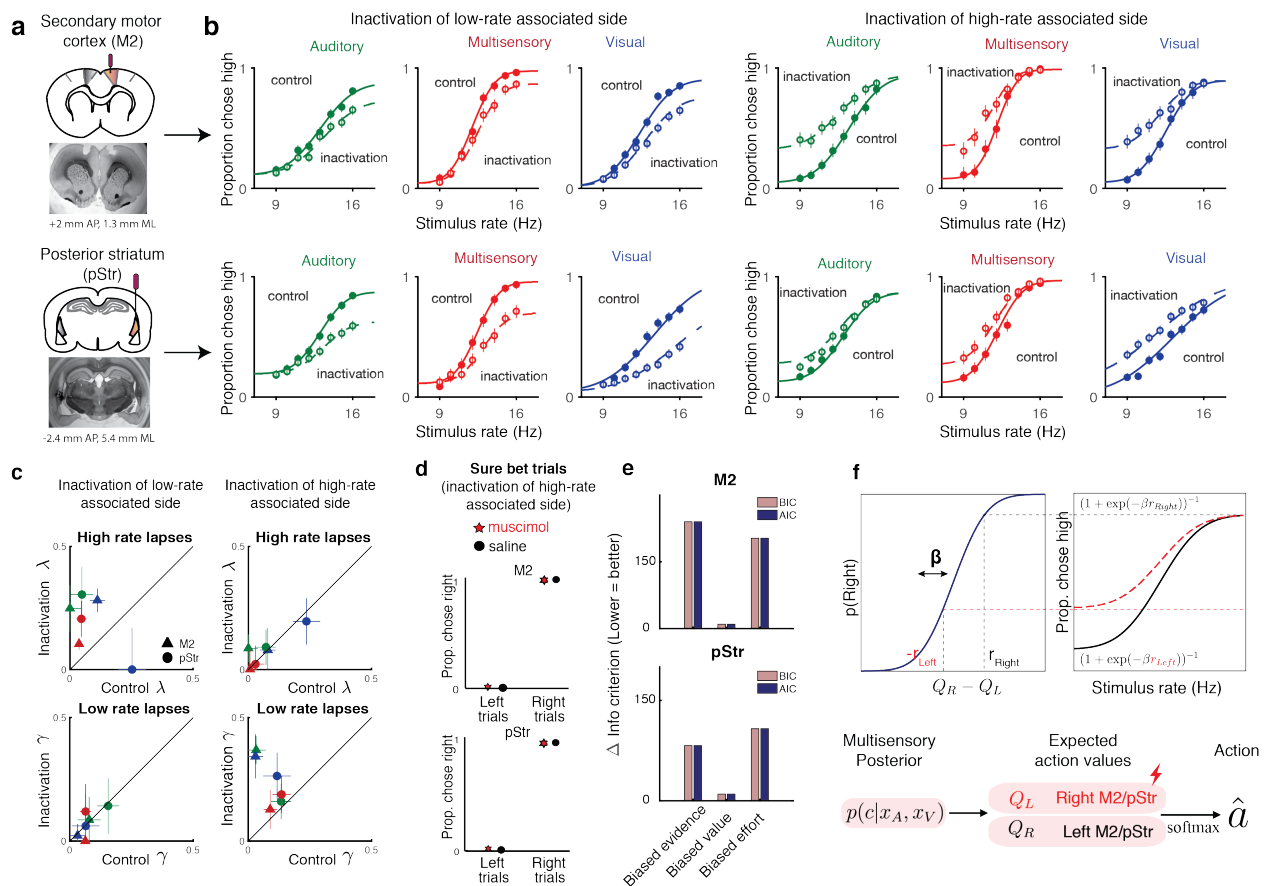

430



431 **Figure 5 Inactivation of secondary motor cortex and posterior striatum affects lapses, suggesting a**  
432 **role in action value encoding. (a)** Schematic of cannulae implants in M2 (top) and pStr (bottom) and repre-  
433 sentative coronal slices. For illustration purposes only, the schematic shows implants in the left hemisphere,  
434 however, the inactivations shown in panel (b) were performed also on the right hemisphere. **(b)** Unilateral  
435 inactivation of M2 (top) and pStr (bottom). Left 6 plots: inactivation of the side associated with low-rates  
436 shows increased lapses for high rates on visual (blue), auditory (green) and multisensory (red) trials (M2: n=5  
437 rats; 10329 control trials, full line; 6174 inactivation trials, dotted line; pStr: n=5 rats; 10419 control trials;  
438 6079 inactivation trials). Right 6 plots: inactivation of the side associated with high-rates shows increased  
439 lapses for low rates on visual, auditory and multisensory trials (M2: n=3 rats; 5678 control trials; 3816  
440 inactivation trials; pStr: n=6 rats; 11333 control trials; 6838 inactivation trials). Solid lines are exploration  
441 model fits, accounting for inactivation effects across all 3 modalities by scaling all contralateral values by a  
442 single parameter. **(c)** Increased high rate lapses following unilateral inactivation of the side associated with  
443 low-rates (top left); no change in low rate lapses (bottom left) and vice versa for inactivation of the side  
444 associated with high-rates (top, bottom right). Control data on the abscissa is plotted against inactivation data  
445 on the ordinate. Same animals as in **b**. Green, auditory trials; blue, visual trials. Abbreviations: posterior  
446 striatum (pStr), secondary motor cortex (M2). **(d)** Sure bet trials are unaffected following inactivation. This  
447 example shows that rats who were inactivated on the side associated with high rates make correct rightward  
448 and leftward choices Top, M2; bottom, pStr. **(e)** Model comparison of three possible multisensory deficits -  
449 reduction of contralateral evidence by a fixed amount (left), reduction of contralateral value by a fixed amount  
450 (center) or an increased contralateral effort by a fixed amount (right). Both AIC and BIC suggest a value  
451 deficit **(f)** Proposed computational role of M2 and Striatum. Lateralized encoding of left and right action

452 values by right and left M2/pStr explain the asymmetric effect of unilateral inactivations on lapses.

## 453 **DISCUSSION**

454 Perceptual decision-makers have long been known to display a small fraction of errors even on easy  
455 trials. Until now, these “lapses” were largely regarded as a nuisance and lacked a comprehensive,  
456 normative explanation. Here, we propose a novel explanation for lapses: that they reflect a strategic  
457 balance between exploiting known rewarding options and exploring uncertain ones. Our model  
458 makes strong predictions for lapses under diverse decision-making contexts, which we have tested  
459 here. First, the model predicts more lapses on conditions with higher uncertainty, such as unisensory  
460 (Fig. 2) or neutral (Fig. 3), compared to multisensory or sure-bet conditions. Second, the model  
461 predicts that asymmetric reward manipulations should only affect lapses on one side, sparing  
462 decisions to the other side and sure-bet trials (Fig. 4). Finally, the model predicts that lapses should  
463 be affected by perturbations to brain regions that encode action value. Accordingly, we observed  
464 that unilateral inactivations of secondary motor cortex and posterior striatum similarly affected  
465 lapses on one side across auditory, visual and multisensory trials (Fig. 5). Taken together, our model  
466 and experimental data argue strongly that far from being a nuisance, lapses are informative about  
467 animals’ subjective action values and reflect a trade-off between exploration and exploitation.

468       Considerations of value have provided many useful insights into aspects of behavior that  
469 seem sub-optimal at first glance from the perspective of perceptual ideal observers. For instance,  
470 many perceptual tasks are designed with accuracy in mind - defining an ideal observer as one

471 who maximizes accuracy, in line with classical signal detection theory. However, in practice, the  
472 success or failure of different actions may be of unequal value to subjects, especially if reward or  
473 punishment is delivered explicitly, as is often the case with non-human subjects. This may give rise  
474 to biases that can only be explained by an observer that maximizes expected utility (Dayan and  
475 Daw, 2008). Similarly, reward outcomes on a given trial can influence decisions about stimuli on  
476 subsequent trials through reinforcement learning, giving rise to serial biases. These biases occur  
477 even though the ideal observer should treat the evidence on successive trials as independent (Busse  
478 et al., 2011; Lak et al., 2018). Finally, when subjects can control how long they sample the stimulus,  
479 subjects maximizing reward rate may choose to make premature decisions, sacrificing accuracy for  
480 speed (Bogacz et al., 2006).

481 Here, we take further inspiration from considerations of value to provide a novel account for  
482 lapses. We leveraged a well known phenomenon in value-based decisions: uncertainty dependent  
483 exploration. Until now, this phenomenon has not been considered a candidate explanation for  
484 lapses in perceptual decisions. Our results argue that lapses are not simply accidental errors made  
485 as a consequence of attentional “blinks” or motor “slips”, but can reflect a deliberate, internal  
486 source of behavioral variability that facilitates learning and information gathering under uncertain  
487 or non-stationary environments.

488 Although exploration no longer yields the maximum utility on any given trial, it is critical  
489 for dynamic environments, and those in which there is uncertainty about probability of reward or  
490 stimulus-response contingency (e.g., during learning). By encouraging subjects to sample multiple

491 options, exploration can potentially improve the subject's knowledge of the rules of the task, helping  
492 it to increase future payoff, thus maximizing expected utility over a long period of time.

493         Balancing exploration and exploitation is computationally challenging, and the mechanism  
494 we propose here, uncertainty dependent exploration, is a well-known, elegant heuristic for achieving  
495 this balance. Also known as Thompson sampling, this strategy has been shown to be asymptotically  
496 optimal in partially observable environments (Leike et al., 2016) and can be naturally implemented  
497 through a sampling scheme where the subject samples action values from a learnt distribution  
498 and then maximizes with respect to the sample (Gershman, 2018). This strategy predicts that  
499 conditions with higher uncertainty should have higher exploration, and consequently higher lapse  
500 rates, explaining the pattern of lapse rates we observed on unisensory vs. multisensory trials as well  
501 as on neutral vs. matched trials. A lower rate of lapses on multisensory trials has also been reported  
502 on a visual-tactile task in rats (Nikbakht et al., 2018) and a vestibular integration task in humans  
503 (Bertolini et al., 2015) and can potentially account for the apparent supra-optimal integration that  
504 has been reported in a number of studies (Nikbakht et al., 2018; Hou et al., 2018; Raposo, Sheppard,  
505 et al., 2012). A strong prediction of uncertainty guided exploration is that the animal should always  
506 exploit on conditions with no uncertainty, as we observed on sure-bet trials (Fig. 4d, 5d).

507         The model also predicts that exploration, and consequently lapses, should decrease with  
508 training as the animal becomes more certain of the rules and expected rewards, explaining training-  
509 dependent effects reported in primates (Law and Gold, 2009). It can also potentially explain why  
510 children have higher lapse rates - they have been shown to be more exploratory in their decisions

511 than adults (Lucas et al., 2014).

512 A unique prediction of the exploration model is that it predicts lapse rates will sometimes  
513 change asymmetrically for left and right decisions. For instance, changing the value associated  
514 with one of the decisions (eg. high rate) should only affect lapses associated with that decision -  
515 predicting fewer lapses on high rates if the rightward reward is increased, and more lapses if it is  
516 decreased, or if leftward decisions are probabilistically rewarded on high rates. These predictions  
517 are borne out (Fig. 4c), and rightward successes or failures on the previous trial have a similar effect.  
518 The model also suggests that the asymmetric effects on lapses seen during unilateral inactivations of  
519 prefrontal and striatal regions (Fig. 5b) arises from a selective devaluation of contralateral actions.  
520 This interpretation reconciles a number of studies that have found asymmetric effects of inactivating  
521 these areas during perceptual decisions (Erlich et al., 2015; Zatzka-Haas et al., 2019; Wang et al.,  
522 2018; Guo et al., 2018) with their established roles in encoding action value (Barthas and Kwan,  
523 2017; Lee et al., 2015) during value-based decisions.

524 An open question that remains is how the brain might tune the degree of exploration in  
525 proportion to uncertainty. An intriguing candidate for this is dopamine, whose tonic levels have  
526 been shown to modulate exploration in mice on a lever-press task (Beeler et al., 2010), and context-  
527 dependent song variability in songbirds (Leblois, Wendel, and Perkel, 2010). Dopaminergic genes  
528 have been shown to predict individual differences in uncertainty-guided exploration in humans  
529 (Frank et al., 2009), and dopaminergic disorders such as Parkinson's disease have been shown to  
530 disrupt the uncertainty-dependence of lapses across conditions (Bertolini et al., 2015). Patients with

531 ADHD, another disorder associated with dopaminergic dysfunction, have been shown to display  
532 both increased perceptual variability and increased task-irrelevant motor output, a measure that  
533 correlates with lapses (Mihali et al., 2018). A promising avenue for future studies is to leverage  
534 the informativeness of lapses and the precise control of uncertainty afforded by multisensory tasks,  
535 in conjunction with perturbations or recordings of dopaminergic circuitry, to further elucidate the  
536 connections between perceptual and value-based decision making systems.

## 537 **METHODS**

### 538 **Behavior**

539 ***Animal Subjects and Housing*** All animal procedures and experiments were in accordance with  
540 the National Institutes of Health's Guide for the Care and Use of Laboratory Animals and were  
541 approved by the Cold Spring Harbor Laboratory Animal Care and Use Committee. Experiments  
542 were conducted with 34 adult male and female Long Evans rats (250-350g, Taconic Farms) that  
543 were housed with free access to food and restricted access to water starting from the onset of  
544 behavioral training. Rats were housed on a reversed light-dark cycle; experiments were run during  
545 the dark part of the cycle. Rats were pair-housed during the whole training period.

546 ***Animal training and behavioral task*** Rats were trained following previously established methods  
547 (Raposo 2012, Sheppard 2013, Raposo 2014, Licata 2017). Briefly, rats were trained to wait in  
548 the center port for 1000 ms while stimuli were presented, and to associate stimuli with left/right  
549 reward ports. Stimuli for each trial consisted of a series of events: auditory clicks from a centrally

550 positioned speaker, full-field visual flashes, or both together. Stimulus events were separated by  
551 either long (100 ms) or short (50 ms) intervals. For the easiest trials, all inter-event intervals were  
552 identical, generating rates that were 9 events/s (all long intervals) or 16 events/s (all short intervals).  
553 More difficult trials included a mixture of long and short intervals, generating stimulus rates that  
554 were intermediate between the two extremes and therefore more difficult for the animal to judge.  
555 The stimulus began after a variable delay following when the rats snout broke the infrared beam  
556 in the center port. The length of this delay was selected from a truncated exponential distribution  
557 ( $\lambda = 30$  ms, minimum = 10 ms, maximum = 200 ms) to generate an approximately flat hazard  
558 function. The total time of the stimulus was usually 1000 ms. Trials of all modalities and stimulus  
559 strengths were interleaved. For multisensory trials, the same number of auditory and visual events  
560 were presented (except for a subset of neutral trials). Auditory and visual stimulus event times were  
561 generated independently, as our previous work has demonstrated that rats make nearly identical  
562 decisions regardless of whether stimulus events are presented synchronously or independently  
563 (Raposo, Sheppard, et al., 2012). For most experiments, rats were rewarded with a drop of water  
564 for moving to the left reward port following low-rate trials and to the right reward port following  
565 high rate trials. For muscimol inactivation experiments half of the rats were rewarded according  
566 to the reverse contingency. Animals typically completed between 700 and 1,200 trials per day.  
567 Most experiments had 18 conditions (3 modalities  $\times$  8 stimulus strengths), leading to 29-50 trials per  
568 condition per day.

569 To probe the effect of uncertainty on lapses, rats received catch trials consisting of multisensory  
570 neutral trials, where only the auditory modality provided evidence for a particular choice, whereas

571 the visual modality provided evidence that was so close to the category boundary (12 Hz) that it did  
572 not support one choice or the other (Raposo, Sheppard, et al., 2012)

573 To probe the effect of value on lapses, we manipulated either reward magnitude or reward  
574 probability associated with high rates, while keeping low rate trials unchanged. To increase or  
575 decrease reward magnitude associated with high rates, the amount of water dispensed on the right  
576 port was increased or decreased to 36ul or 16 ul respectively, while the reward on the left port  
577 was maintained at 24 ul. To manipulate reward probability, we occasionally rewarded rats on the  
578 (incorrect) left port on high rate trials with a probability of 0.5. The right port was still rewarded  
579 with a probability of 1 on high rates, and reward probabilities on low rate trials were unchanged (1  
580 on the left port, 0 on the right).

### 581 **Analysis of behavioral data.**

582 **Psychometric curves.** Descriptive four-parameter psychometric functions were fit to choice data us-  
583 ing the Palamedes toolbox (Prins and Kingdom, 2018). Psychometric functions were parameterized  
584 as:

$$\psi(x; \mu, \sigma, \gamma, \lambda) = \phi(x; \mu, \sigma)(1 - \lambda - \gamma) + \gamma \quad (1)$$

585 where  $\gamma$  and  $\lambda$  are the lower and upper asymptote of the psychometric function, which parameterize  
586 the lapse rates on the left and to the right, respectively;  $\phi$  is a cumulative normal function;  $x$  is the  
587 event rate, i.e. the number of flashes or beeps presented during the one second stimulus period;  $\mu$   
588 parameterizes the x-value at the midpoint of the psychometric function and  $\sigma$  describes the inverse  
589 slope. 95% Confidence intervals on these parameters were generated via bootstrapping based on



590 1000 simulations.

## 591 **Modeling**

### 592 *Ideal observer model*

593 We can specify an ideal observer model for our task using Bayesian Decision Theory (Dayan and  
594 Daw, 2008). This observer maintains probability distributions over previously experienced stimuli  
595 and choices, computes the posterior probability of each action being correct given its observations  
596 and picks the action that yields the highest expected reward.

597 Let the true category on any given trial be  $c_{true}$ , the true stimulus rate be  $s_{true}$  and the animal's  
598 noisy visual and auditory observations of  $s_{true}$  be  $x_V$  and  $x_A$ , respectively. We assume that the two  
599 sensory channels are corrupted by independent gaussian noise with standard deviation  $\sigma_A$  and  $\sigma_V$ ,  
600 respectively, giving rise to conditionally independent observations.

$$p(x_A|s_{true}) = \mathcal{N}(s_{true}, \sigma_A), \quad p(x_V|s_{true}) = \mathcal{N}(s_{true}, \sigma_V), \quad (2)$$

$$p(x_A, x_V|s_{true}) = p(x_A|s_{true})p(x_V|s_{true})$$

601 The ideal observer can use this knowledge to compute the likelihood of seeing the current trial's  
602 observations as a function of the hypothesized stimulus rate  $s$ . This likelihood  $\mathcal{L}$  is a gaussian

603 function of  $s$  with a mean given by a weighted sum of the observations  $x_A$  and  $x_V$ ,:

$$\begin{aligned}
 \mathcal{L}(s) &= p(x_A, x_V | s) = p(x_A | s)p(x_V | s) \\
 &\propto \mathcal{N}(\mu_M, \sigma_M) \\
 \mu_M &= w_A x_A + w_V x_V \\
 \sigma_M &= (\sigma_A^{-2} + \sigma_V^{-2})^{-\frac{1}{2}} \\
 w_A &= \frac{\sigma_M^2}{\sigma_A^2}, \quad w_V = \frac{\sigma_M^2}{\sigma_V^2}
 \end{aligned} \tag{3}$$

604 The likelihood of seeing the observations as a function of the hypothesized category  $c$ , is given  
 605 by marginalizing over all possible hypothesized stimulus rates. Let the experimentally imposed  
 606 category boundary be  $\mu_0$ , such that stimulus rates are considered high when  $s > \mu_0$  and low when  
 607  $s < \mu_0$ . Then,

$$\begin{aligned}
 \mathcal{L}(c = \text{High}) &= p(x_A, x_V | c = \text{High}) \\
 &= \int_s p(x_A, x_V, s | c = \text{High}) ds \\
 &= \int_s p(x_A, x_V | s) p(s | c = \text{High}) ds \quad \because x_a, x_V \perp c | s \\
 &= \int_{s > \mu_0} p(x_A, x_V | s) ds \\
 &\propto 1 - \Phi(\mu_0; \mu_M, \sigma_M)
 \end{aligned} \tag{4}$$

608 where  $\Phi$  is the cumulative normal function. Using Bayes' rule, the ideal observer can then compute  
 609 the probability that the current trial was high or low rate given the observations, i.e. the posterior

610 probability.

$$\begin{aligned}
 p(c|x_A, x_V) &= \frac{p(x_A, x_V|c)p(c)}{p(x_A, x_V)} \\
 \implies p(c = \mathbf{High}|x_A, x_V) &\propto p_{High}(1 - \Phi(\mu_0; \mu_M, \sigma_M)) \\
 \implies p(c = \mathbf{Low}|x_A, x_V) &\propto p_{Low}\Phi(\mu_0; \mu_M, \sigma_M)
 \end{aligned}
 \tag{5}$$

611 where  $p_{High}$  and  $p_{Low}$  are the prior probabilities of high and low rates respectively. The expected  
 612 value  $Q(a)$  of choosing right or left actions (also known as the action values) is obtained by  
 613 marginalizing the learnt value of state-action pairs  $q(c, a)$  over the unobserved state  $c$ .

$$\begin{aligned}
 Q(a = R) &= p(\mathbf{High}|x_A, x_V)q(High, R) + p(\mathbf{Low}|x_A, x_V)q(Low, R) \\
 Q(a = L) &= p(\mathbf{High}|x_A, x_V)q(High, L) + p(\mathbf{Low}|x_A, x_V)q(Low, L)
 \end{aligned}
 \tag{6}$$

614 Under the standard contingency, high rates are rewarded on the right and low rates on the left,  
 615 so for a trained observer that has fully learnt the contingency,  $q(High, R) \rightarrow r_R, q(High, L) \rightarrow$   
 616  $0, q(Low, R) \rightarrow 0, q(Low, L) \rightarrow r_L$ , with  $r_R$  and  $r_L$  being reward magnitudes for rightward and  
 617 leftward actions. This simplifies the action values to:

$$\begin{aligned}
 Q(R) &= p(\mathbf{High}|x_A, x_V)r_R \propto p_{High}(1 - \Phi(\mu_0; \mu_M, \sigma_M))r_R \\
 Q(L) &= p(\mathbf{Low}|x_A, x_V)r_L \propto p_{Low}\Phi(\mu_0; \mu_M, \sigma_M)r_L
 \end{aligned}
 \tag{7}$$

618 The max-reward decision rule involves picking the action  $\hat{a}$  with the highest expected reward:

$$\hat{a} = \operatorname{argmax} Q(a)$$

$$\text{i.e. } \hat{a} = R \iff Q(R) > Q(L)$$

$$\iff p_{High}(1 - \Phi(\mu_0; \mu_M, \sigma_M))r_R > p_{Low}\Phi(\mu_0; \mu_M, \sigma_M)r_L \quad (8)$$

$$\iff \Phi(\mu_M; \mu_0, \sigma_M) > \frac{1}{1 + \frac{p_{High}r_R}{p_{Low}r_L}}$$

$$\iff w_A x_A + w_V x_V > \Phi^{-1}\left(\frac{1}{1 + \frac{p_{High}r_R}{p_{Low}r_L}}; \mu_0, (\sigma_A^{-2} + \sigma_V^{-2})^{-\frac{1}{2}}\right)$$

619 In the special case of equal rewards and uniform stimulus and category priors, this reduces to

620 choosing right when the weighted sum of observations is to the right of the true category boundary,

621 i.e.  $w_A x_A + w_V x_V > \mu_0$ . Note that this is a deterministic decision rule for any given observations

622  $x_A$  and  $x_V$ , however, since these are noisy and gaussian distributed around the true stimulus rate

623  $s_{true}$ , the likelihood of making a rightward decision is given by the cumulative gaussian function  $\Phi$ :

624

$$\text{For } p_{High} = p_{Low}, r_R = r_L$$

$$p(\hat{a} = R|s) = p(w_A x_A + w_V x_V > \mu_0|s)$$

$$= \Phi(s_{true}; \mu_0, \sigma)$$

$$\sigma = \begin{cases} \sigma_A & \text{on auditory trials} \\ \sigma_V & \text{on visual trials} \\ (\sigma_A^{-2} + \sigma_V^{-2})^{\frac{1}{2}} & \text{on multisensory trials} \end{cases} \quad (9)$$

625

626 We can measure this probability empirically through the psychometric curve. Fitting it with a two  
627 parameter cumulative gaussian function yields  $\mu$  and  $\sigma$  which can be compared to ideal observer  
628 predictions. The  $\sigma$  parameter is then taken to reflect sensory noise; and with the assumption of uni-  
629 form priors and equal rewards, the  $\mu$  parameter is taken to reflect the subjective category boundary.  
630 Although  $\mu$  should equal  $\mu_0$  for the ideal observer, in practice it is treated as a free parameter, and  
631 deviations of  $\mu$  from  $\mu_0$  could reflect any of three possible suboptimalities: 1) a subjective category  
632 boundary mismatched to the true one, 2) mismatched priors, or 3) unequal subjective rewards of the  
633 two actions.

634

### 635 *Inattention model*

636 The traditional model for lapse rates assumes that on a fixed proportion of trials, the animal fails to  
637 pay attention to the stimulus, guessing randomly between the two actions. We can incorporate this  
638 suboptimality into the ideal observer above as follows: Let the probability of attending be  $p_{attend}$ .  
639 Then, on  $1 - p_{attend}$  fraction of trials, the animal does not attend to the stimulus (i.e. receives  
640 no evidence), effectively making  $\sigma_{sensory} \rightarrow \infty$  and giving rise to a posterior that is equal to the  
641 prior. On these trials, the animal may choose to maximize this prior (always picking the option  
642 that's more likely a-priori, guessing with 50-50 probability if both options are equally likely), or  
643 probability-match the prior (guessing in proportion to its prior). Let us call this guessing probability  
644  $p_{bias}$ . Then, the probability of a rightward decision is given by marginalizing over the attentional  
645 state:

646

$$\begin{aligned} p(\hat{a} = R|s) &= p(\hat{a} = R|s, \text{attend})p(\text{attend}) + p(\hat{a} = R|s, \sim \text{attend})p(\sim \text{attend}) \\ &= p(\hat{a} = R|s)p_{\text{attend}} + p_{\text{bias}}(1 - p_{\text{attend}}) \end{aligned} \quad (10)$$

647 Comparing this with the standard 4-parameter sigmoid used in psychometric fitting, we obtain

$$\begin{aligned} p(\hat{a} = R|s_{\text{true}}) &= \gamma + (1 - \gamma - \lambda)\Phi(s_{\text{true}}; \mu_0, \sigma) \\ \implies \gamma + \lambda &= p_{\text{attend}}, \quad \frac{\gamma}{\gamma + \lambda} = p_{\text{bias}} \end{aligned} \quad (11)$$

648 where  $\gamma$  and  $\lambda$  are the lower and upper asymptotes respectively, collectively known as “lapses”.

649 In this model, the sum of the two lapses depends on the probability of attending, which could be

650 modulated in a bottom up fashion by the salience of the stimulus; their ratio depends on the guessing

651 probability, which in turn depends on the observer’s priors and subjective rewards.

652

### 653 ***Motor error/ $\epsilon$ greedy model***

654 Lapses can also occur if the observer doesn’t always pick the reward-maximizing or “exploit”

655 decision. This might occur due to random errors in motor execution on a small fraction of trials

656 given by  $\epsilon$ , or it might reflect a deliberate propensity to occasionally make random “exploratory”

657 choices to gather information about rules and rewards. This is known as an  $\epsilon$ -greedy decision rule,

658 where the observer chooses randomly (or according to  $p_{\text{bias}}$ ) on  $\epsilon$  fraction of trials. Both these

659 models yield predictions similar to those of the inattention model:

$$\begin{aligned} p(\hat{a} = R|s) &= p(\hat{a} = R|s)(1 - \epsilon) + \epsilon p_{bias} \\ \implies \gamma + \lambda &= \epsilon, \quad \frac{\gamma}{\gamma + \lambda} = p_{bias} \end{aligned} \tag{12}$$

660

### 661 *Softmax exploration model*

662 A more sophisticated form of exploration is the “softmax” decision rule, which explores options in  
663 proportion to their expected rewards, allowing for a balance between exploration and exploitation  
664 through the tuning of a parameter  $\beta$  known as inverse temperature. In particular, in conditions of  
665 greater uncertainty about rules or rewards, it is advantageous to be more exploratory and have a  
666 lower  $\beta$ . This strategy is known as Thompson sampling, and can be achieved by sampling from a  
667 belief distribution over expected rewards and maximizing with respect to the sample, reducing to a  
668 softmax rule whose  $\beta$  depends on the total uncertainty in expected reward (Gershman, 2018).

$$\begin{aligned} p(\hat{a} = R|Q(a)) &= \frac{\exp \beta Q(R)}{\exp \beta Q(L) + \exp \beta Q(R)} \\ &= \frac{1}{1 + \exp(-\beta(Q(R) - Q(L)))} \end{aligned} \tag{13}$$

669 The proportion of rightward choices conditioned on the true stimulus rate is then obtained  
670 by marginalizing over the latent action values  $Q(a)$ , using the fact that the choice depends on  $s$   
671 only through its effect on  $Q(a)$ , where  $\rho$  is the animal’s posterior belief in a high rate stimulus,  
672 i.e.  $\rho = p(c = High|x_A, x_V)$ .  $\rho$  is often referred to as the *belief state* in reinforcement learning

673 problems involving partial observability such as our task.

$$\begin{aligned} p(\hat{a} = R|s) &= \int_{Q(a)} p(\hat{a} = R, Q(a)|s) dQ \\ &= \int_{Q(a)} p(\hat{a} = R|Q(a)) p(Q(a)|s) dQ \quad \because \hat{a} \perp s|Q(a) \\ &= \int_{\rho} \frac{1}{1 + \exp(-\beta(\rho(r_R + r_L) - r_L))} \frac{\mathcal{N}(\Phi^{-1}(1 - \rho, 0, \sigma_{post}), \mu_0 - s, \sigma_{post})}{\mathcal{N}(\Phi^{-1}(1 - \rho, 0, \sigma_{post}), 0, \sigma_{post})} d\rho \end{aligned} \quad (14)$$

674 Since lapses are the asymptotic probabilities of the lesser rewarding action at extremely easy  
675 stimulus rates, we can derive them from this expression by setting  $\rho \rightarrow 1$  or  $\rho \rightarrow 0$ . This yields

$$\gamma = \frac{1}{1 + \exp(\beta r_L)}, \quad \lambda = \frac{1}{1 + \exp(\beta r_R)} \quad (15)$$

676 Critically, in this model, the upper and lower lapses are dissociable, depending only on the  
677 rightward or leftward rewards, respectively. Such a softmax decision rule has been used to account  
678 for suboptimalities in value based decisions (Dayan and Daw, 2008), however it has not been  
679 used to account for lapses in perceptual decisions. Other suboptimal decision rules described  
680 in perceptual decisions, such as generalized probability matching or posterior sampling (Acerbi,  
681 Vijayakumar, and Wolpert, 2014; Drugowitsch, Wyart, et al., 2016; Ortega and Braun, 2013) amount  
682 to a softmax on log-posteriors or log-expected values, rather than on expected values, and do not  
683 produce lapses since in these decision rules, when the posterior probability goes to 1, so does the  
684 decision probability.

685



## 686 **Model fitting**

687 Model fits were obtained from custom maximum likelihood fitting code using MATLAB's `fmincon`,  
688 by maximizing the marginal likelihood of rightward choices given the stimulus on each trial as  
689 computed from each model. Confidence intervals for fit parameters were generated using the hessian  
690 obtained from `fmincon`. Fits to multiple conditions were performed jointly, taking into account any  
691 linear or nonlinear (eg. optimality) constraints on parameters across conditions. Model comparisons  
692 were done using AIC and BIC.

## 693 **Surgical procedures**

694 All rats subject to surgery were anesthetized with 1%-3% isoflurane. Isoflurane anesthesia was  
695 maintained by monitoring respiration, heart rate, oxygen and CO<sub>2</sub> levels, as well as foot pinch  
696 responses throughout the surgical procedure. Ophthalmic ointment was applied to keep the eyes  
697 moistened throughout surgery. After scalp shaving, the skin was cleaned with 70% ethanol and 5%  
698 betadine solution. Lidocaine solution was injected below the scalp to provide local analgesia prior  
699 to performing scalp incisions. Meloxicam (5mg/ml) was administered subcutaneously (2mg/kg)  
700 for analgesia at the beginning of the surgery, and daily 2-3 days post-surgery. The animals were  
701 allowed at least 7 days to recover before behavioral training.

702 *Viral injections*- 2 rats, 15 weeks of age, were anesthetized and placed in a stereotaxic apparatus  
703 (Kopf Instruments). Small craniotomies were made in the center of primary visual cortex (V1;  
704 6.9mm posterior to Bregma, 4.2mm to the right of midline) and primary auditory cortex (A1;  
705 4.7mm posterior to Bregma, 7mm to the right of midline). Small durotomies were performed

706 at each craniotomy and virus was pressure injected at depths of 600, 800, and 1000  $\mu\text{m}$  below  
707 the pia (150 nL/depth). Virus injections were performed using Drummond Nanoject III, which  
708 enables automated delivery of small volumes of virus. To minimize virus spread, the Nanoject  
709 was programmed to inject slowly: fifteen 10 nL boluses, 30 seconds apart. Each bolus was  
710 delivered at 10 nL/sec. 2-3 minutes were allowed following injection at each depth to allow for  
711 diffusion of virus. The AAV2.CB7.CI.EGFP.WPRE.RBG construct was injected in V1, and the  
712 AAV2.CAG.tdTomato.WPRE.SV40 construct was injected in A1. Viruses were obtained from the  
713 University of Pennsylvania vector core.

714 ***Cannulae implants*** Rats were anesthetized and placed in the stereotax as described above. After  
715 incision and skull cleaning, 2 skull screws were implanted to add more surface area for the dental  
716 cement. For striatal implants, two craniotomies were made, one each side of the skull (3.2mm  
717 posterior to Bregma; 5.4mm to the right and left of midline). Durotomies were performed and a  
718 guide cannula (22 gauge, 8.5 mm long; PlasticsOne) was placed in the brain, 4.1mm below the pia  
719 at each craniotomy. For secondary motor cortex implants, one large craniotomy spanning the right  
720 and left M2 was performed (~5mm x ~2mm in size centered around 2mm anterior to Bregma and  
721 3.1mm to the right and left of midline). A durotomy was performed and a double guide cannula  
722 (22 gauge, 4mm long; PlasticsOne) was placed in the brain, 300um below the pia. The exposed  
723 brain was covered with sterile Vaseline and cannulae were anchored to the skull with dental acrylic  
724 (Relyx). Single or double dummy cannulae protruding 0.7 mm below the guide cannulae were  
725 inserted.

## 726 **Inactivation with muscimol**

727 Rats were lightly anesthetized with isoflurane. Muscimol was unilaterally infused into pStr or M2  
728 with a final concentration of 0.075-0.125  $\mu\text{g}$  and 0.1-0.5  $\mu\text{g}$ , respectively. A single/double-internal  
729 cannula (PlasticsOne), connected to a 2  $\mu\text{l}$  syringe (Hamilton microliter syringe, 7000 series), was  
730 inserted into each previously implanted guide cannula. Internal cannulae protruded 0.5mm below  
731 the guide. Muscimol was delivered using an infusion pump (Harvard PHD 22/2000) at a rate of 0.1  
732  $\mu\text{l}/\text{minute}$ . Internal cannulae were kept in the brain for 3 additional minutes to allow for diffusion  
733 of muscimol. Rats were removed from anesthesia and returned to cages for 15 minutes before  
734 beginning behavioral sessions. The same procedure was used in control sessions, where muscimol  
735 was replaced with sterile saline.

## 736 **Histology**

737 At the conclusion of inactivation experiments, animals were deeply anesthetized with Euthasol  
738 (pentobarbital and phenytoin). Animals were perfused transcardially with 4% paraformaldehyde.  
739 Brains were extracted and post-fixed in 4% paraformaldehyde for 24-48 hours. After post-fixing,  
740 50-100  $\mu\text{m}$  coronal sections were cut on a vibratome (Leica) and imaged.

## 741 **References**

742 Acerbi, Luigi, Sethu Vijayakumar, and Daniel M Wolpert (2014). “On the origins of suboptimality  
743 in human probabilistic inference”. In: *PLoS computational biology* 10.6, e1003661.

- 744 Barthas, Florent and Alex C Kwan (2017). “Secondary motor cortex- where sensory meets motor in  
745 the rodent frontal cortex”. In: *Trends in neurosciences* 40.3, pp. 181–193.
- 746 Bays, Paul M, Raquel FG Catalao, and Masud Husain (2009). “The precision of visual working  
747 memory is set by allocation of a shared resource”. In: *Journal of vision* 9.10, pp. 7–7.
- 748 Beeler, Jeff A et al. (2010). “Tonic dopamine modulates exploitation of reward learning”. In:  
749 *Frontiers in behavioral neuroscience* 4, p. 170.
- 750 Bertolini, Giovanni et al. (2015). “Impaired tilt perception in Parkinsons disease- a central vestibular  
751 integration failure”. In: *PloS one* 10.4, e0124253.
- 752 Bogacz, Rafal et al. (2006). “The physics of optimal decision making: a formal analysis of models of  
753 performance in two-alternative forced-choice tasks.” In: *Psychological review* 113.4, p. 700.
- 754 Busse, Laura et al. (2011). “The detection of visual contrast in the behaving mouse”. In: *Journal of*  
755 *Neuroscience* 31.31, pp. 11351–11361.
- 756 Carandini, Matteo and Anne K Churchland (2013). “Probing perceptual decisions in rodents”. In:  
757 *Nature neuroscience* 16.7, p. 824.
- 758 Dayan, Peter and Nathaniel D Daw (2008). “Decision theory, reinforcement learning, and the brain”.  
759 In: *Cognitive, Affective, & Behavioral Neuroscience* 8.4, pp. 429–453.
- 760 Drugowitsch, Jan and Alexandre Pouget (2018). “Learning optimal decisions with confidence”. In:  
761 *bioRxiv*, p. 244269.
- 762 Drugowitsch, Jan, Valentin Wyart, et al. (2016). “Computational precision of mental inference as  
763 critical source of human choice suboptimality”. In: *Neuron* 92.6, pp. 1398–1411.

- 764 Erlich, Jeffrey C et al. (2015). “Distinct effects of prefrontal and parietal cortex inactivations on an  
765 accumulation of evidence task in the rat”. In: *Elife* 4, e05457.
- 766 Ernst, Marc O and Heinrich H Bulthoff (2004). “Merging the senses into a robust percept”. In:  
767 *Trends in cognitive sciences* 8.4, pp. 162–169.
- 768 Findling, Charles et al. (2018). “Computational noise in reward-guided learning drives behavioral  
769 variability in volatile environments”. In: *bioRxiv*, p. 439885.
- 770 Frank, Michael J et al. (2009). “Prefrontal and striatal dopaminergic genes predict individual  
771 differences in exploration and exploitation”. In: *Nature neuroscience* 12.8, p. 1062.
- 772 Garrido, Marta I, Raymond J Dolan, and Maneesh Sahani (2011). “Surprise leads to noisier  
773 perceptual decisions”. In: *i-Perception* 2.2, pp. 112–120.
- 774 Gershman, Samuel J (2015). “A unifying probabilistic view of associative learning”. In: *PLoS*  
775 *computational biology* 11.11, e1004567.
- 776 — (2018). “Deconstructing the human algorithms for exploration”. In: *Cognition* 173, pp. 34–42.
- 777 Gold, Joshua I and Long Ding (2013). “How mechanisms of perceptual decision-making affect the  
778 psychometric function”. In: *Progress in neurobiology* 103, pp. 98–114.
- 779 Green, David M, John A Swets, et al. (1966). *Signal detection theory and psychophysics*. Vol. 1.  
780 Wiley New York.
- 781 Guo, Lan et al. (2018). “Stable representation of sounds in the posterior striatum during flexible  
782 auditory decisions”. In: *Nature communications* 9.1, p. 1534.
- 783 Hou, Han et al. (2018). “Neural correlates of optimal multisensory decision making”. In: *bioRxiv*,  
784 p. 480178.

- 785 Jiang, Haiyan and Hyoung F Kim (2018). “Anatomical inputs from the sensory and value structures  
786 to the tail of the rat striatum”. In: *Frontiers in neuroanatomy* 12.
- 787 Lak, Armin et al. (2018). “Dopaminergic and frontal signals for decisions guided by sensory  
788 evidence and reward value”. In: *bioRxiv*, p. 411413.
- 789 Law, Chi-Tat and Joshua I Gold (2009). “Reinforcement learning can account for associative and  
790 perceptual learning on a visual-decision task”. In: *Nature neuroscience* 12.5, p. 655.
- 791 Leblois, Arthur, Benjamin J Wendel, and David J Perkel (2010). “Striatal dopamine modulates  
792 basal ganglia output and regulates social context-dependent behavioral variability through D1  
793 receptors”. In: *Journal of Neuroscience* 30.16, pp. 5730–5743.
- 794 Lee, A Moses et al. (2015). “Between the primate and reptilian brain- rodent models demonstrate  
795 the role of corticostriatal circuits in decision making”. In: *Neuroscience* 296, pp. 66–74.
- 796 Leike, Jan et al. (2016). “Thompson sampling is asymptotically optimal in general environments”.  
797 In: *arXiv preprint arXiv:1602.07905*.
- 798 Licata, Angela M et al. (2017). “Posterior parietal cortex guides visual decisions in rats”. In: *Journal  
799 of Neuroscience* 37.19, pp. 4954–4966.
- 800 Lucas, Christopher G et al. (2014). “When children are better (or at least more open-minded)  
801 learners than adults: Developmental differences in learning the forms of causal relationships”.  
802 In: *Cognition* 131.2, pp. 284–299.
- 803 Mendonca, Andre G et al. (2018). “The impact of learning on perceptual decisions and its implication  
804 for speed-accuracy tradeoffs”. In: *bioRxiv*, p. 501858.

- 805 Mihali, Andra et al. (2018). “A Low-Level Perceptual Correlate of Behavioral and Clinical Deficits  
806 in ADHD”. In: pp. 1–23.
- 807 Nikbakht, Nader et al. (2018). “Supralinear and supramodal integration of visual and tactile signals  
808 in rats: psychophysics and neuronal mechanisms”. In: *Neuron* 97.3, pp. 626–639.
- 809 Odoemene, Onyekachi et al. (2018). “Visual evidence accumulation guides decision-making in  
810 unrestrained mice”. In: *Journal of Neuroscience* 38.47, pp. 10143–10155.
- 811 Ortega, Pedro A and Daniel A Braun (2013). “Thermodynamics as a theory of decision-making  
812 with information-processing costs”. In: *Proceedings of the Royal Society A: Mathematical,  
813 Physical and Engineering Sciences* 469.2153, p. 20120683.
- 814 Piet, Alex T et al. (2017). “Rat prefrontal cortex inactivations during decision making are explained  
815 by bistable attractor dynamics”. In: *Neural computation* 29.11, pp. 2861–2886.
- 816 Pinto, Lucas et al. (2018). “An accumulation-of-evidence task using visual pulses for mice navigating  
817 in virtual reality”. In: *Frontiers in behavioral neuroscience* 12, p. 36.
- 818 Prins, Nicolaas and Frederick AA Kingdom (2018). “Applying the model-comparison approach to  
819 test specific research hypotheses in psychophysical research using the Palamedes Toolbox”.  
820 In: *Frontiers in psychology* 9.
- 821 Raposo, David, Matthew T Kaufman, and Anne K Churchland (2014). “A category-free neural  
822 population supports evolving demands during decision-making”. In: *Nature neuroscience*  
823 17.12, p. 1784.
- 824 Raposo, David, John P Sheppard, et al. (2012). “Multisensory decision-making in rats and humans”.  
825 In: *Journal of neuroscience* 32.11, pp. 3726–3735.

- 826 Roy, Nicholas G et al. (2018). “Efficient inference for time-varying behavior during learning”. In:  
827 *Advances in Neural Information Processing Systems*, pp. 5700–5710.
- 828 Scott, Benjamin B et al. (2015). “Sources of noise during accumulation of evidence in unrestrained  
829 and voluntarily head-restrained rats”. In: *Elife* 4, e11308.
- 830 Shen, Shan and Wei Ji Ma (2019). “Variable precision in visual perception.” In: *Psychological*  
831 *review* 126.1, p. 89.
- 832 Sheppard, John P, David Raposo, and Anne K Churchland (2013). “Dynamic weighting of mul-  
833 tisensory stimuli shapes decision-making in rats and humans”. In: *Journal of vision* 13.6,  
834 pp. 4–4.
- 835 Wang, Lupeng et al. (2018). “Activation of striatal neurons causes a perceptual decision bias during  
836 visual change detection in mice”. In: *Neuron* 97.6, pp. 1369–1381.
- 837 Wichmann, Felix A and N Jeremy Hill (2001). “The psychometric function: I. Fitting, sampling,  
838 and goodness of fit”. In: *Perception & psychophysics* 63.8, pp. 1293–1313.
- 839 Witton, Caroline, Joel B Talcott, and G Bruce Henning (2017). “Psychophysical measurements in  
840 children: challenges, pitfalls, and considerations”. In: *PeerJ* 5, e3231.
- 841 Yartsev, Michael M et al. (2018). “Causal contribution and dynamical encoding in the striatum  
842 during evidence accumulation.” In: *Elife* 7.
- 843 Yu, Angela J and Jonathan D Cohen (2009). “Sequential effects: superstition or rational behavior?”  
844 In: *Advances in neural information processing systems*, pp. 1873–1880.
- 845 Zatzka-Haas, Peter et al. (2019). “Distinct contributions of mouse cortical areas to visual discrimina-  
846 tion”. In: *bioRxiv*, p. 501627.



847 Zhou, Baohua et al. (2018). “Chance, long tails, and inference in a non-Gaussian, Bayesian theory  
848 of vocal learning in songbirds”. In: *Proceedings of the National Academy of Sciences* 115.36,  
849 E8538–E8546.

850 **Acknowledgements** We thank Matt Kaufman, Simon Musall, Onyekachi Odoemene, Ashley Juavinett,  
851 Farzaneh Najafi, Akihiro Funamizu, Priyanka Gupta, Anne Urai, James Roach, Colin Stoneking, Diksha  
852 Gupta, Tatiana Engel, Rob Phillips, Tony Zador, Steve Shea and Bo Li for scientific advice and discussions,  
853 and Angela Licata, Steven Gluf, Liete Einhorn, Dennis Maharjan, Alexa Pagliaro, Edward Lu and Barry  
854 Burbach for technical assistance. We thank Partha Mitra, Alexander Tolpygo and Stephen Savoia for help  
855 with slicing and imaging virus injected brains. This work was supported by the Simons Collaboration on the  
856 Global Brain, ONR MURI, the Eleanor Schwartz Fund, the Pew Charitable Trust and the Watson School of  
857 Biological Sciences.

858 **Competing Interests** The authors declare that they have no competing financial interests.

859 **Correspondence** Correspondence and requests for materials should be addressed to Anne K. Church-  
860 land (email: churchland@cshl.edu).
